# Supplementary material
Source: PubMed Central journal article supplement (PMC3174562)
Supplement: supp_00334.2010_supfigs.pdf [file supp_00334.2010_supfigs.pdf]

Online Figure 1  
Zhang et al.

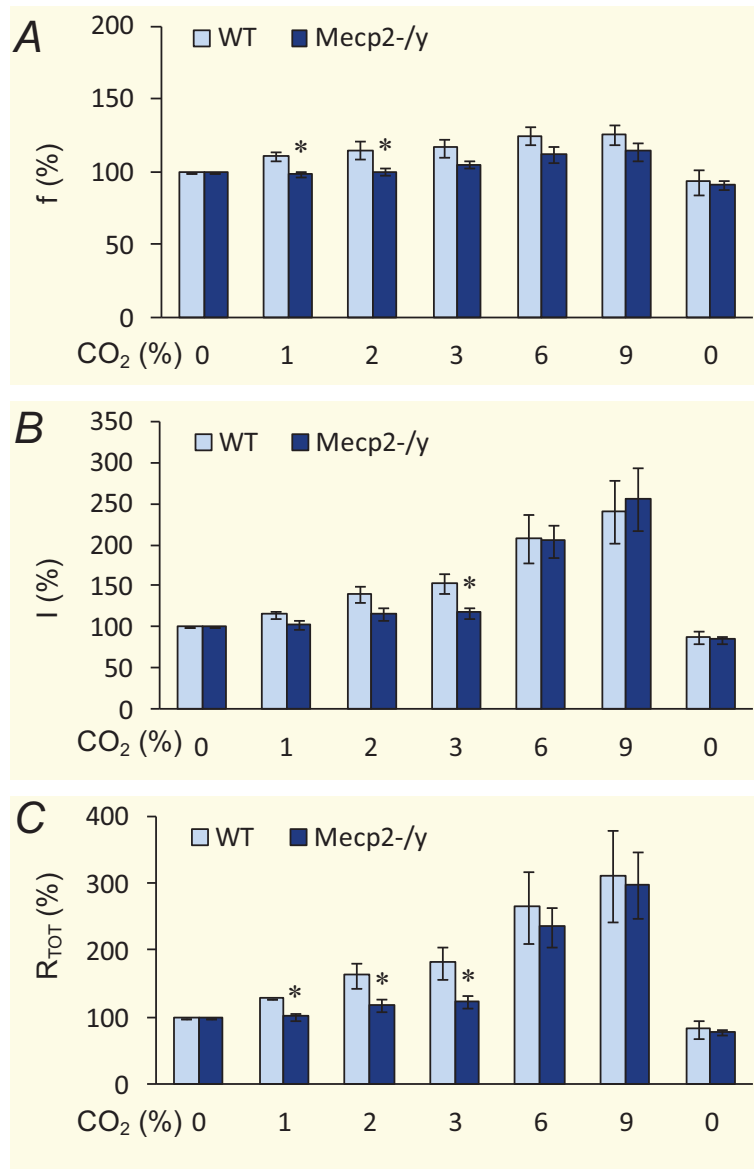

**Fig. S1.** The  $f$ ,  $I$  and  $R_{TOT}$  were analyzed with various levels of  $CO_2$  breathing in WT and mutant Prp57 mice with GFP expression in LC neurons. The  $Mecp2^{-/-}$  mice failed to respond to low dose ( $\leq 3\%$ )  $CO_2$  in all three measures (\*,  $P < 0.05$ ,  $n = 4$  pairs of mice), although all of these respiratory parameters appeared normal with 6 and 9%  $CO_2$  in  $Mecp2^{-/-}$  mice.

Online Figure 2  
Zhang et al.

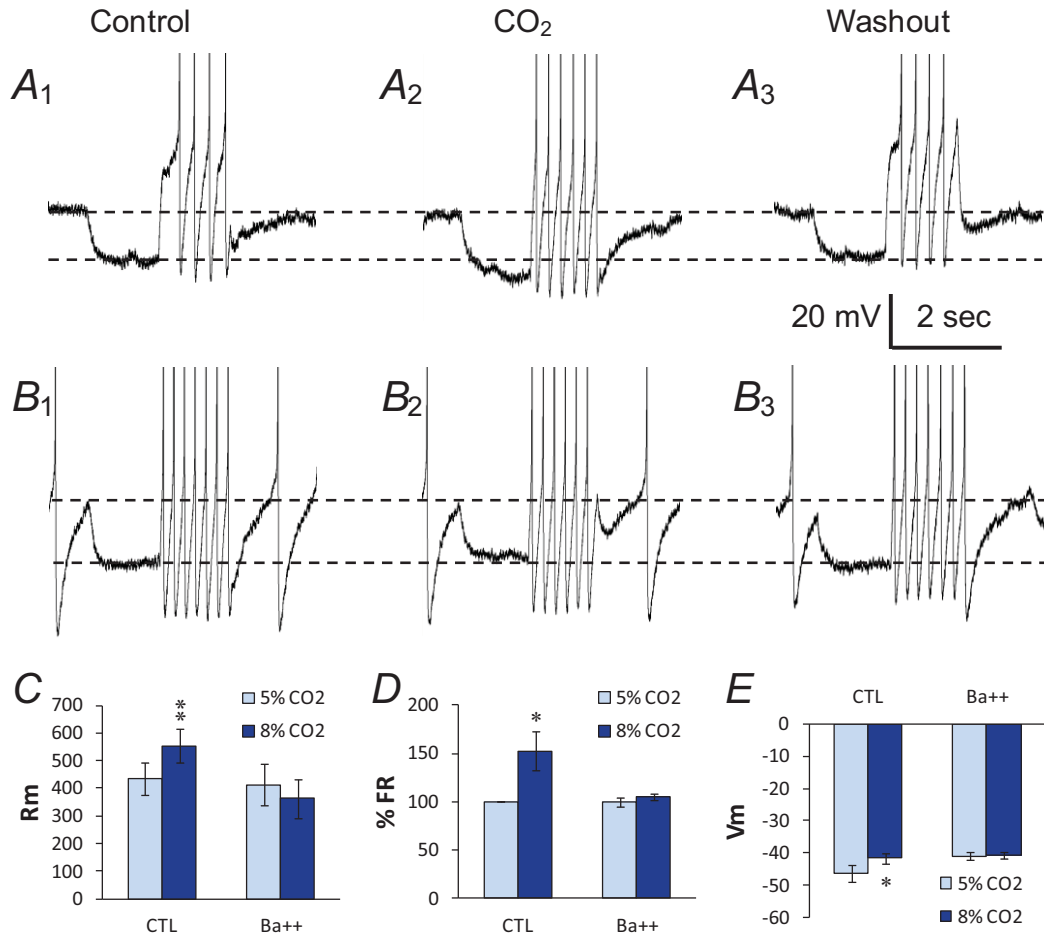

**Fig. S2.** Effects of Ba<sup>2+</sup> on neuronal response to 8% CO<sub>2</sub> in WT neurons. **A,B.** Responses of Rm to CO<sub>2</sub> (8%) without (**A**) and with Ba<sup>2+</sup> (**B**). The Rm was measured with injection of -0.02nA current pulses. The distance between two dash-lines indicates Rm with 5% CO<sub>2</sub> (**A1**, control) that was raised with the application of 8% CO<sub>2</sub> (**A2**). Such a CO<sub>2</sub> response was abolished in the presence of 200μM Ba<sup>2+</sup> (**B**), which was summarized in **C** and expressed in percentage change. The hypercapnia-induced increase in firing frequency (**D**) and depolarization (**E**) were also suppressed when cells were exposed to Ba<sup>2+</sup>. \*, P<0.05; \*\*, P<0.01 by paired *t*-test.

Online Figure 3  
Zhang et al.

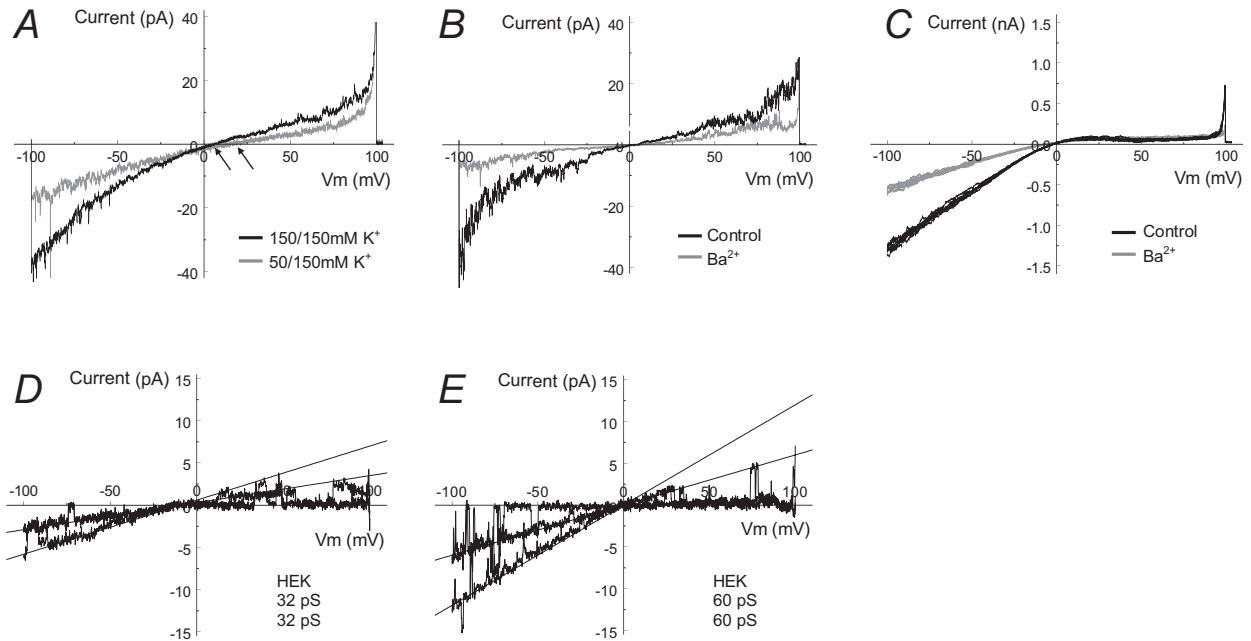

**Fig. S3.** *A.* Ionic currents were recorded in the inside-out patch from a WT neuron. The currents had inward rectification and showed a reversal potential at  $\sim 0$  mV with symmetric  $K^+$  concentration (150mM/150mM  $K^+$ ) on both sides of patch membranes. When  $K^+$  was replaced with 100mM  $Na^+$  on the intracellular side (50mM/150mM  $K^+$ ), the reversal potential right-shifted by 20mV (indicated with arrows), indicating that the channels are  $K^+$  selective. *B,C.*  $Ba^{2+}$  sensitivity of Kir currents in LC neurons (*B*) and HEK cells expressing Kir4.1/Kir5.1 channels (*C*). Application of 200 $\mu$ M  $Ba^{2+}$  to intracellular membranes of inside-out patches inhibited neuronal Kir currents to the same degree as  $Ba^{2+}$  inhibition to Kir4.1/Kir5.1 currents expressed in HEK cells. *D,E.* Single channel conductance of homomeric Kir4.1 channels (*D*) and heteromeric Kir4.1/Kir5.1 channels (*E*) was measured in inside-out patches from HEK cells with a ramp voltage from  $-100$  to  $100$  mV. The straight lines indicate slope conductance of 32pS (*D*) and 60pS (*E*), respectively.

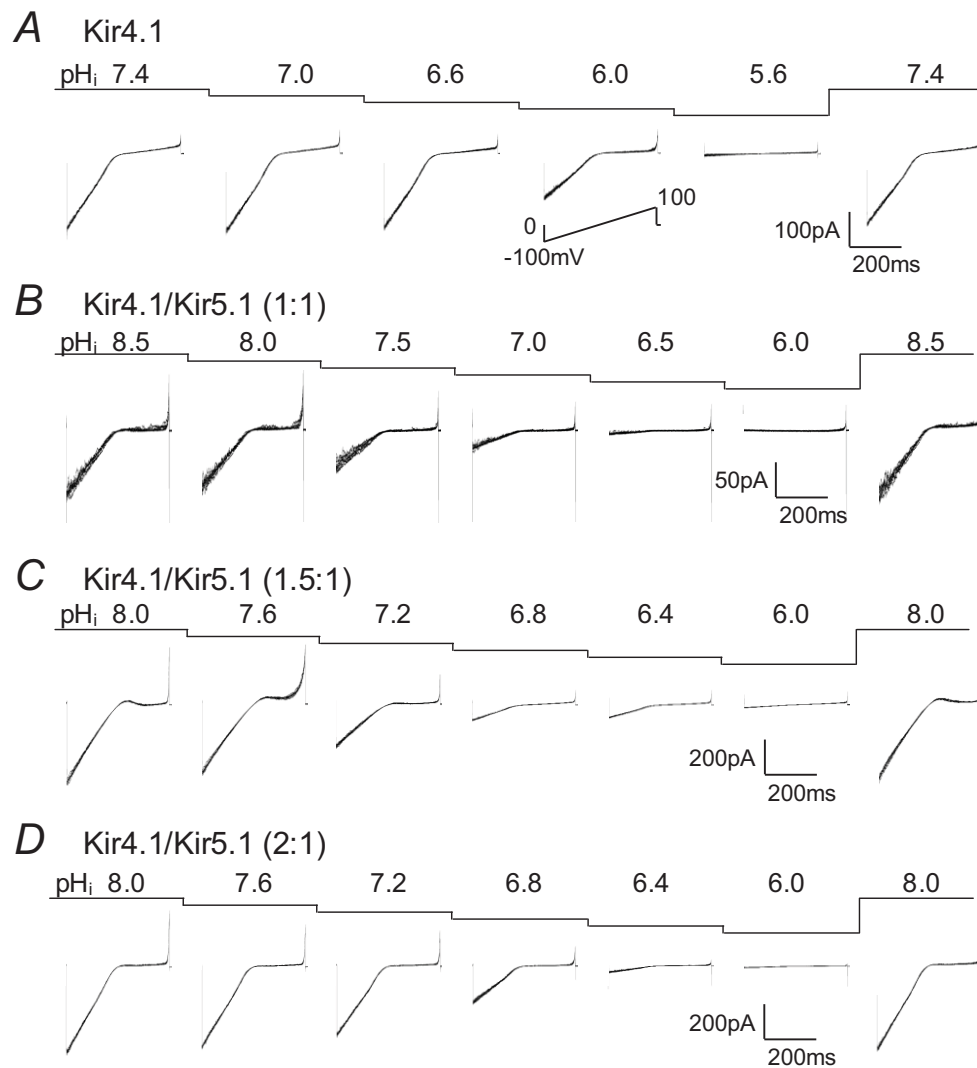

**Fig. S4.** Acidic pH<sub>i</sub> induced dose-dependent inhibitions of Kir4.1 or/and Kir5.1 channels in HEK cells. In-side out patches were obtained from HEK cells expressing the Kir4.1 channel alone (**A**), Kir4.1 and Kir5.1 in a ratio of 1:1 (**B**), 1.5:1 (**C**) and 2:1 (**D**), respectively. With different Kir4.1/Kir5.1 ratios, the currents showed clearly different pH sensitivity. Note that 8 superimposed traces are shown in each panel.
